# Supplementary material
Source: PubMed Central journal article supplement (PMC8756360)
Supplement: jamasurg-e216900-s002.pdf [file jamasurg-e216900-s002.pdf]

\*Indicates required information. Only first name, last name, and suffix will appear in PubMed.

| <b>*Group Name(s): Collaborators</b>     |                   |                              |                  |                                                        |                                          |                                                         |                                                                                            |
|------------------------------------------|-------------------|------------------------------|------------------|--------------------------------------------------------|------------------------------------------|---------------------------------------------------------|--------------------------------------------------------------------------------------------|
| <b>*First Name and Middle Initial(s)</b> | <b>*Last Name</b> | <b>*Suffix (eg, Jr, III)</b> | Academic Degrees | Institution                                            | Location (city, state/province, country) | Role or Contribution, eg, chair, principal investigator | Group (if more than 1 Group listed in the byline) and/or Subgroup (eg, Steering Committee) |
| Charles                                  | Parsons           |                              | MD               | Beth Israel Deaconess Medical Center                   | Boston, MA                               | Co-Investigator                                         | Clinical Coordinating Center                                                               |
| Nathan I.                                | Shapiro           |                              | MD, MPH          | Beth Israel Deaconess Medical Center                   | Boston, MA                               | Co-Investigator                                         | Clinical Coordinating Center                                                               |
| Randall                                  | Cooper            |                              |                  | Columbia University Medical Center                     | New York, NY                             | Co-Investigator                                         | Clinical Coordinating Center                                                               |
| Aleksandr                                | Tichter           |                              | MD               | Columbia University Medical Center                     | New York, NY                             | Co-Investigator                                         | Clinical Coordinating Center                                                               |
| Arden                                    | Morris            |                              | MD, MPH          | Stanford University                                    | Stanford, CA                             | Clinical Reviewer                                       | Data Safety and Monitoring Board                                                           |
| Bruce                                    | Wolfe             |                              | MD               | Oregon Health & Science University                     | Portland, OR                             | Clinical Reviewer                                       | Data Safety and Monitoring Board                                                           |
| Donald M.                                | Yealy             |                              | MD               | University of Pittsburgh Medical Center                | Pittsburgh, PA                           | Clinical Reviewer                                       | Data Safety and Monitoring Board                                                           |
| Karla                                    | Ballman           |                              | PhD              | Weill Cornell Medical Center                           | New York, NY                             | Clinical Reviewer                                       | Data Safety and Monitoring Board                                                           |
| Kathleen                                 | O'Connor          |                              | EdD              |                                                        |                                          | Clinical Reviewer                                       | Data Safety and Monitoring Board                                                           |
| Olga                                     | Owens             |                              | N-PC             |                                                        | Las Vegas, NV                            | Clinical Reviewer                                       | Data Safety and Monitoring Board                                                           |
| Thomas                                   | Diflo             |                              | MD               | Westchester Medical Center                             | Valhalla, NY                             | Clinical Reviewer                                       | Data Safety and Monitoring Board                                                           |
| Alyssa                                   | Hayward           |                              |                  | Henry Ford Health Hospital                             | Detroit, MI                              | Study Staff                                             | Clinical Coordinating Center                                                               |
| Lillian Adrianna                         | Hayes             |                              |                  | Henry Ford Health Hospital                             | Detroit, MI                              | Study Staff                                             | Clinical Coordinating Center                                                               |
| Joe H.                                   | Patton            |                              | MD               | Henry Ford Health Hospital                             | Detroit, MI                              | Co-investigator                                         | Clinical Coordinating Center                                                               |
| Hikmatullah                              | Arif              |                              |                  | Harborview Medical Center                              | Seattle, WA                              | Study Staff                                             | Clinical Coordinating Center                                                               |
| Laura                                    | Hennessey         |                              | RN               | Harborview Medical Center                              | Seattle, WA                              | Study Staff                                             | Clinical Coordinating Center                                                               |
| Erika                                    | Wolff             |                              | PhD              | Harborview Medical Center                              | Seattle, WA                              | Co-Investigator                                         | Executive Committee                                                                        |
| Farhood                                  | Farjah            |                              | MD, MPH          | Harborview Medical Center                              | Seattle, WA                              | Co-Investigator                                         |                                                                                            |
| Kelsey                                   | Pullar            |                              | MPH              | Harborview Medical Center                              | Seattle, WA                              | Study Staff                                             | Clinical Coordinating Center                                                               |
| Brett                                    | Faine             |                              | PharmD           | University of Iowa Healthcare                          | Iowa City, IA                            | Co-Investigator                                         | Clinical Coordinating Center                                                               |
| Cathy                                    | Fairfield         |                              | BSN              | University of Iowa Healthcare                          | Iowa City, IA                            | Study Staff                                             | Clinical Coordinating Center                                                               |
| Dionne                                   | Skeete            |                              | MD               | University of Iowa Healthcare                          | Iowa City, IA                            | Co-Investigator                                         | Clinical Coordinating Center                                                               |
| Debbie                                   | Lew               |                              |                  | University of Texas Lyndon B. Johnson General Hospital | Houston, TX                              | Study Staff                                             | Clinical Coordinating Center                                                               |
| Karla                                    | Bernardi          |                              | MD               | University of Texas Lyndon B. Johnson General Hospital | Houston, TX                              | Co-Investigator                                         | Clinical Coordinating Center                                                               |
| Naila                                    | Dhanani           |                              | MD               | University of Texas Lyndon B. Johnson General Hospital | Houston, TX                              | Co-Investigator                                         | Clinical Coordinating Center                                                               |
| Oscar                                    | Olavarria         |                              | MD               | University of Texas Lyndon B. Johnson General Hospital | Houston, TX                              | Co-Investigator                                         | Clinical Coordinating Center                                                               |
| Stephanie                                | Marquez           |                              |                  | University of Texas Lyndon B. Johnson General Hospital | Houston, TX                              | Co-Investigator                                         | Clinical Coordinating Center                                                               |
| Tien C.                                  | Ko                |                              | MD               | University of Texas Lyndon B. Johnson General Hospital | Houston, TX                              | Co-Investigator                                         | Clinical Coordinating Center                                                               |
| Vance                                    | Sohn              |                              | MD               | Madigan Army Medical Center                            | Joint Base Lewis-McChord, Washington     | Co-Investigator                                         | Clinical Coordinating Center                                                               |
| Alan                                     | Jones             |                              | MD               | University of Mississippi Medical Center               | Jackson, MS                              | Co-investigator                                         | Clinical Coordinating Center                                                               |
| Deepti                                   | Patki             |                              | MS               | University of Mississippi Medical Center               | Jackson, MS                              | Study Staff                                             | Clinical Coordinating Center                                                               |
| Matthew                                  | Kutcher           |                              | MD               | University of Mississippi Medical Center               | Jackson, MS                              | Co-Investigator                                         | Clinical Coordinating Center                                                               |
| Rebekah K.                               | Peacock           |                              | RN               | University of Mississippi Medical Center               | Jackson, MS                              | Study Staff                                             | Clinical Coordinating Center                                                               |
| Bruce                                    | Chung             |                              | MD               | Maine Medical Center                                   | Portland, ME                             | Co-Investigator                                         | Clinical Coordinating Center                                                               |
| Damien                                   | Carter            |                              | MD               | Maine Medical Center                                   | Portland, ME                             | Co-Investigator                                         | Clinical Coordinating Center                                                               |
| David                                    | MacKenzie         |                              | MD               | Maine Medical Center                                   | Portland, ME                             | Co-Investigator                                         | Clinical Coordinating Center                                                               |
| Debra                                    | Burris            |                              | RN               | Maine Medical Center                                   | Portland, ME                             | Study Staff                                             | Clinical Coordinating Center                                                               |
| Joseph                                   | Mack              |                              | MD               | Maine Medical Center                                   | Portland, ME                             | Co-Investigator                                         | Clinical Coordinating Center                                                               |
| Terilee                                  | Gerry             |                              | MS, RN           | Maine Medical Center                                   | Portland, ME                             | Study Staff                                             | Clinical Coordinating Center                                                               |
| Emily E.                                 | Anderson          |                              | PhD, MPH         | University of Chicago Stritch School of Medicine       | Chicago, IL                              | Advisor                                                 | National Advisory Board                                                                    |
| Darrell A.                               | Campbell          | Jr.                          | MD               | Michigan Medicine                                      | Ann Arbor, MI                            | Advisor                                                 | National Advisory Board                                                                    |
| Fergal                                   | Fleming           |                              | MD               | University of Rochester Medical Center                 | Rochester, NY                            | Advisor                                                 | National Advisory Board                                                                    |
| David B.                                 | Hoyt              |                              | MD               | American College of Surgeons                           | Chicago, IL                              | Advisor                                                 | National Advisory Board                                                                    |
| J.J.                                     | Tepas             | III                          | MD               | deceased                                               | Jacksonville, FL                         | Advisor                                                 | National Advisory Board                                                                    |
| Richard W.                               | Whitten           |                              | MD               | UW Medicine                                            | Seattle, WA                              | Advisor                                                 | National Advisory Board                                                                    |
| SreyRam                                  | Kuy               |                              | MD               | Baylor College of Medicine                             | Houston, Tx                              | Advisor                                                 | National Advisory Board                                                                    |
| Daniel S.                                | Lessler           |                              | MD, MHA          | University of Washington                               | Seattle, WA                              | Advisor                                                 | National Advisory Board                                                                    |
| Jason                                    | Maggi             |                              | MD               | Tisch Hospital NYU Langone Medical Center              | New York, NY                             | Co-Investigator                                         | Clinical Coordinating Center                                                               |
| Kristyn                                  | Pierce            |                              | MS               | Tisch Hospital NYU Langone Medical Center              | New York, NY                             | Co-Investigator                                         | Clinical Coordinating Center                                                               |

\*Indicates required information. Only first name, last name, and suffix will appear in PubMed.

| *First Name and Middle Initial(s) | *Last Name   | *Suffix (eg, Jr, III) | Academic Degrees | Institution                                                 | Location (city, state/province, country) | Role or Contribution, eg, chair, principal investigator | Group (if more than 1 Group listed in the byline) and/or Subgroup (eg, Steering Committee) |
|-----------------------------------|--------------|-----------------------|------------------|-------------------------------------------------------------|------------------------------------------|---------------------------------------------------------|--------------------------------------------------------------------------------------------|
| Marcovalerio                      | Melis        |                       | MD               | Tisch Hospital NYU Langone Medical Center                   | New York, NY                             | Co-Investigator                                         | Clinical Coordinating Center                                                               |
| Mohamad                           | Abouzeid     |                       | MD               | Tisch Hospital NYU Langone Medical Center                   | New York, NY                             | Co-Investigator                                         | Clinical Coordinating Center                                                               |
| Paresh                            | Shah         |                       | MD               | Tisch Hospital NYU Langone Medical Center                   | New York, NY                             | Co-Investigator                                         | Clinical Coordinating Center                                                               |
| Prashant                          | Sinha        |                       | MD               | Tisch Hospital NYU Langone Medical Center                   | New York, NY                             | Co-Investigator                                         | Clinical Coordinating Center                                                               |
| William                           | Chiang       |                       | MD               | Tisch Hospital NYU Langone Medical Center                   | New York, NY                             | Co-Investigator                                         | Clinical Coordinating Center                                                               |
| Amy                               | Rushing      |                       | MD               | The Ohio State University Wexner Medical Center             | Columbus, OH                             | Co-Investigator                                         | Clinical Coordinating Center                                                               |
| Steven                            | Steinberg    |                       | MD               | The Ohio State University Wexner Medical Center             | Columbus, OH                             | Co-Investigator                                         | Clinical Coordinating Center                                                               |
| Elliott                           | Skopin       |                       | BS               | PAB                                                         | Seattle, WA                              | Advisor                                                 | Patient Advisory Board                                                                     |
| Heather                           | VanDusen     |                       | BS               | PAB                                                         | Seattle, WA                              | Advisor                                                 | Patient Advisory Board                                                                     |
| Kimberly                          | Deeney       |                       | BA               | PAB                                                         | Medford, MA                              | Advisor                                                 | Patient Advisory Board                                                                     |
| Mary                              | Guiden       |                       | BA               | PAB                                                         | Fort Collins, CO                         | Advisor                                                 | Patient Advisory Board                                                                     |
| Meridith                          | Weiss        |                       | MPH              | PAB                                                         | Seattle, WA                              | Advisor                                                 | Patient Advisory Board                                                                     |
| Miriam                            | Hernandez    |                       |                  | PAB                                                         |                                          | Advisor                                                 | Patient Advisory Board                                                                     |
| Brandon                           | Tudor        |                       | MD               | Providence Regional Medical Center Everett                  | Everett, Washington                      | Co-Investigator                                         | Clinical Coordinating Center                                                               |
| Careen                            | Foster       |                       | MD               | Providence Regional Medical Center Everett                  | Everett, Washington                      | Co-Investigator                                         | Clinical Coordinating Center                                                               |
| Shaina                            | Schaetzel    |                       | MD               | Providence Regional Medical Center Everett                  | Everett, Washington                      | Co-Investigator                                         | Clinical Coordinating Center                                                               |
| Dayna                             | Morgan       |                       | MSNBC            | Swedish Medical Center                                      | Seattle, WA                              | Study Staff                                             | Clinical Coordinating Center                                                               |
| John                              | Tschirhart   |                       | MD               | Swedish Medical Center                                      | Seattle, WA                              | Co-Investigator                                         | Clinical Coordinating Center                                                               |
| Julie                             | Wallick      |                       | BS, BA           | Swedish Medical Center                                      | Seattle, WA                              | Study Staff                                             | Clinical Coordinating Center                                                               |
| Katherine                         | Mandell      |                       | MD, MPH          | Swedish Medical Center                                      | Seattle, WA                              | Co-Investigator                                         | Clinical Coordinating Center                                                               |
| Ryan                              | Martinez     |                       | MD               | Swedish Medical Center                                      | Seattle, WA                              | Co-Investigator                                         | Clinical Coordinating Center                                                               |
| Sean                              | Wells        |                       | MD               | Swedish Medical Center                                      | Seattle, WA                              | Co-Investigator                                         | Clinical Coordinating Center                                                               |
| Brant                             | Putnam       |                       | MD               | Harbor- University of California Los Angeles Medical Center | Los Angeles, CA                          | Co-Investigator                                         | Clinical Coordinating Center                                                               |
| Dennis                            | Kim          |                       | MD               | Harbor- University of California Los Angeles Medical Center | Los Angeles, CA                          | Co-Investigator                                         | Clinical Coordinating Center                                                               |
| Erin C.                           | Howell       |                       | MD               | Harbor- University of California Los Angeles Medical Center | Los Angeles, CA                          | Co-Investigator                                         | Clinical Coordinating Center                                                               |
| Lara H.                           | Spence       |                       | MD               | Harbor- University of California Los Angeles Medical Center | Los Angeles, CA                          | Co-Investigator                                         | Clinical Coordinating Center                                                               |
| Ross                              | Fleischman   |                       | MD               | Harbor- University of California Los Angeles Medical Center | Los Angeles, CA                          | Co-Investigator                                         | Clinical Coordinating Center                                                               |
| Darin                             | Saltzman     |                       | MD, PhD          | Olive View- University of California Los Angeles Medical Ce | Los Angeles, CA                          | Co-Investigator                                         | Clinical Coordinating Center                                                               |
| Debbie                            | Mireles      |                       | NP               | Olive View- University of California Los Angeles Medical Ce | Los Angeles, CA                          | Study Staff                                             | Clinical Coordinating Center                                                               |
| Formosa                           | Chen         |                       | MD, MPH          | Olive View- University of California Los Angeles Medical Ce | Los Angeles, CA                          | Co-Investigator                                         | Clinical Coordinating Center                                                               |
| Gregory                           | Moran        |                       | MD               | Olive View- University of California Los Angeles Medical Ce | Los Angeles, CA                          | Co-Investigator                                         | Clinical Coordinating Center                                                               |
| Kavitha                           | Pathmarajah  |                       | MPH              | Olive View- University of California Los Angeles Medical Ce | Los Angeles, CA                          | Study Staff                                             | Clinical Coordinating Center                                                               |
| Lisandra                          | Uribe        |                       | BA               | Olive View- University of California Los Angeles Medical Ce | Los Angeles, CA                          | Study Staff                                             | Clinical Coordinating Center                                                               |
| Paul J                            | Schmit       |                       | MD               | Olive View- University of California Los Angeles Medical Ce | Los Angeles, CA                          | Co-Investigator                                         | Clinical Coordinating Center                                                               |
| Robert                            | Bennion      |                       | MD               | Olive View- University of California Los Angeles Medical Ce | Los Angeles, CA                          | Co-Investigator                                         | Clinical Coordinating Center                                                               |
| Cindy                             | Hsu          |                       | MD, PHD          | University of Michigan Medical Center                       | Ann Arbor, MI                            | Co-Investigator                                         | Clinical Coordinating Center                                                               |
| Krishnan                          | Raghavendran |                       | MBBS, MS         | University of Michigan Medical Center                       | Ann Arbor, MI                            | Study Staff                                             | Clinical Coordinating Center                                                               |
| Nathan                            | Haas         |                       | MD               | University of Michigan Medical Center                       | Ann Arbor, MI                            | Co-Investigator                                         | Clinical Coordinating Center                                                               |
| Norman                            | Olbrich      |                       |                  | University of Michigan Medical Center                       | Ann Arbor, MI                            | Study Staff                                             | Clinical Coordinating Center                                                               |
| Pauline                           | Park         |                       | MD               | University of Michigan Medical Center                       | Ann Arbor, MI                            | Co-Investigator                                         | Clinical Coordinating Center                                                               |
| Amber                             | Sabbatini    |                       | MD, MPH          | University of Washington                                    | Seattle, WA                              | Co-Investigator                                         | Clinical Coordinating Center                                                               |
| Daniel                            | Kim          |                       | MD               | University of Washington                                    | Seattle, WA                              | Co-Investigator                                         | Clinical Coordinating Center                                                               |
| Estel                             | Williams     |                       | MD               | University of Washington                                    | Seattle, WA                              | Co-Investigator                                         | Clinical Coordinating Center                                                               |
| Karen                             | Horvath      |                       | MD               | University of Washington                                    | Seattle, WA                              | Co-Investigator                                         | Clinical Coordinating Center                                                               |
| Zoe                               | Parr         |                       | MD               | University of Washington                                    | Seattle, WA                              | Co-Investigator                                         | Clinical Coordinating Center                                                               |
| Karen F.                          | Miller       |                       | RN, MPA          | Vanderbilt University Medical Center                        | Nashville, Tennessee                     | Study Staff                                             | Clinical Coordinating Center                                                               |
| Kelly M.                          | Moser        |                       |                  | Vanderbilt University Medical Center                        | Nashville, Tennessee                     | Study Staff                                             | Clinical Coordinating Center                                                               |
| Abigail                           | Wiebusch     |                       | MD               | Virginia Mason Medical Center                               | Seattle, WA                              | Co-Investigator                                         | Clinical Coordinating Center                                                               |
| Julianna                          | Yu           |                       | MD               | Virginia Mason Medical Center                               | Seattle, WA                              | Co-Investigator                                         | Clinical Coordinating Center                                                               |
| Scott                             | Osborn       |                       | MD               | Virginia Mason Medical Center                               | Seattle, WA                              | Co-Investigator                                         | Clinical Coordinating Center                                                               |
| Billie                            | Johnsson     |                       | MS               | Weill Cornell Medical Center                                | New York, NY                             | Co-Investigator                                         | Clinical Coordinating Center                                                               |
| Lauren                            | Mount        |                       | MD               | Weill Cornell Medical Center                                | New York, NY                             | Co-Investigator                                         | Clinical Coordinating Center                                                               |

\*Indicates required information. Only first name, last name, and suffix will appear in PubMed.

| <b>*First Name and Middle Initial(s)</b> | <b>*Last Name</b> | <b>*Suffix (eg, Jr, III)</b> | Academic Degrees | Institution                  | Location (city, state/province, country) | Role or Contribution, eg, chair, principal investigator | Group (if more than 1 Group listed in the byline) and/or Subgroup (eg, Steering Committee) |
|------------------------------------------|-------------------|------------------------------|------------------|------------------------------|------------------------------------------|---------------------------------------------------------|--------------------------------------------------------------------------------------------|
| Robert J.                                | Winchell          |                              | MD               | Weill Cornell Medical Center | New York, NY                             | Co-Investigator                                         | Clinical Coordinating Center                                                               |
| Sunday                                   | Clark             |                              | ScD, MPH         | Weill Cornell Medical Center | New York, NY                             | Co-Investigator                                         | Clinical Coordinating Center                                                               |
